# Supplementary material for: Variational Bayesian phylogenies through matrix representation of tree space
Source: PeerJ journal article supplement (doi:10.7717/peerj.17276), 2024-04-29
Supplement: suppinfo.pdf [file suppinfo.pdf]

## 1 SUPPLEMENTARY INFORMATION

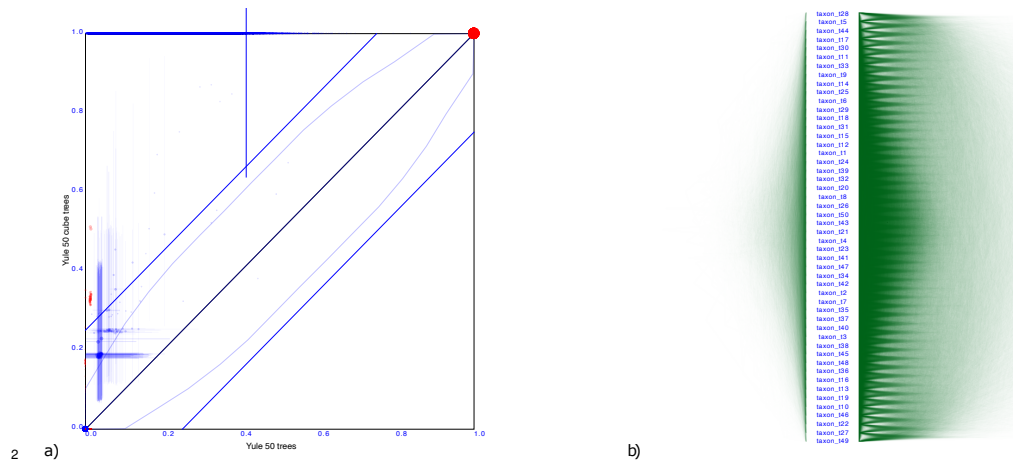

3 **Figure S1** As Figure 3, but with a tree sampled from a Yule prior with 50 taxa, resulting in a tree set  
4 sampled uniformly over ranked trees and has high entropy. The cube representation of this tree set has  
5 substantially older internal nodes and higher clade support for many clades than the original tree set.
